# Supplementary material
Source: PubMed Central journal article supplement (PMC4282973)
Supplement: NIHMS644757-supplement-Combined_Supplementary_Data.pdf [file NIHMS644757-supplement-Combined_Supplementary_Data.pdf]

**Journal title: Hypermethylation of repeat expanded C9orf72 is a clinical and molecular disease modifier**

**Journal name: Acta Neuropathologica**

Authors: Jenny Russ, PhD,<sup>1</sup> Elaine Y. Liu,<sup>1</sup> Kathryn Wu,<sup>1</sup> Donald Neal,<sup>2</sup> EunRan Suh, PhD,<sup>2</sup> David J. Irwin, MD,<sup>2,3</sup> Corey T. McMillan, PhD,<sup>3</sup> Matthew B. Harms,<sup>4</sup> Nigel J. Cairns,<sup>4</sup> Elisabeth M. Wood, MS,<sup>2</sup> Sharon X. Xie, PhD,<sup>5</sup> Lauren Elman, MD,<sup>3</sup> Leo McCluskey, MD,<sup>3</sup> Murray Grossman, MD,<sup>3</sup> Vivianna M. Van Deerlin, MD, PhD,<sup>2</sup> and Edward B. Lee, MD, PhD<sup>1</sup>

Affiliations:

1. Translational Neuropathology Research Laboratory, Department of Pathology and Laboratory Medicine, Perelman School of Medicine at the University of Pennsylvania, Philadelphia, PA
2. Center for Neurodegenerative Disease Research, Perelman School of Medicine at the University of Pennsylvania, Philadelphia, PA
3. Department of Neurology, Perelman School of Medicine at the University of Pennsylvania, Philadelphia, PA
4. Department of Neurology, Washington University School of Medicine, St. Louis, MO
5. Department of Biostatistics and Epidemiology, Perelman School of Medicine at the University of Pennsylvania, Philadelphia, PA

Corresponding author: Edward B. Lee, M.D., Ph.D.

Corresponding email: [edward.lee@uphs.upenn.edu](mailto:edward.lee@uphs.upenn.edu)

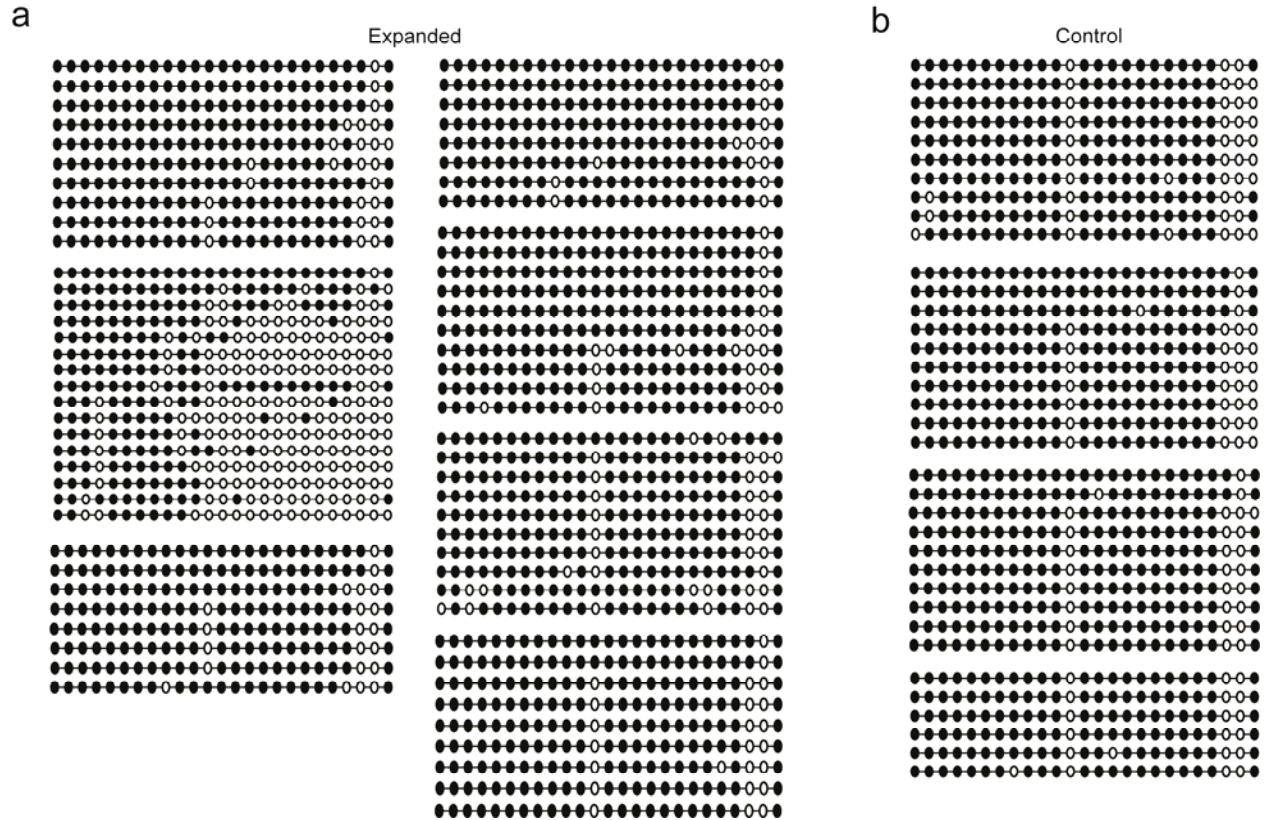

**Figure S1: Bisulfite cloning results of *HhaI* digested genomic DNA.**

Genomic DNA from (a) 7 *C9orf72* expansion carriers, including 5 cerebella and 2 patient derived lymphoblastoid cell lines, and (b) 4 control cerebella was used. Each oval represents a CpG site, where black ovals are methylated CpG dinucleotides and white ovals are unmethylated CpG dinucleotides. The 2<sup>nd</sup> CpG is the site assayed in the *HhaI*-qPCR assay. Six to sixteen clones of each case were included in the analysis. Background conversion rate of non-CpG cytosines for each case was >95%.

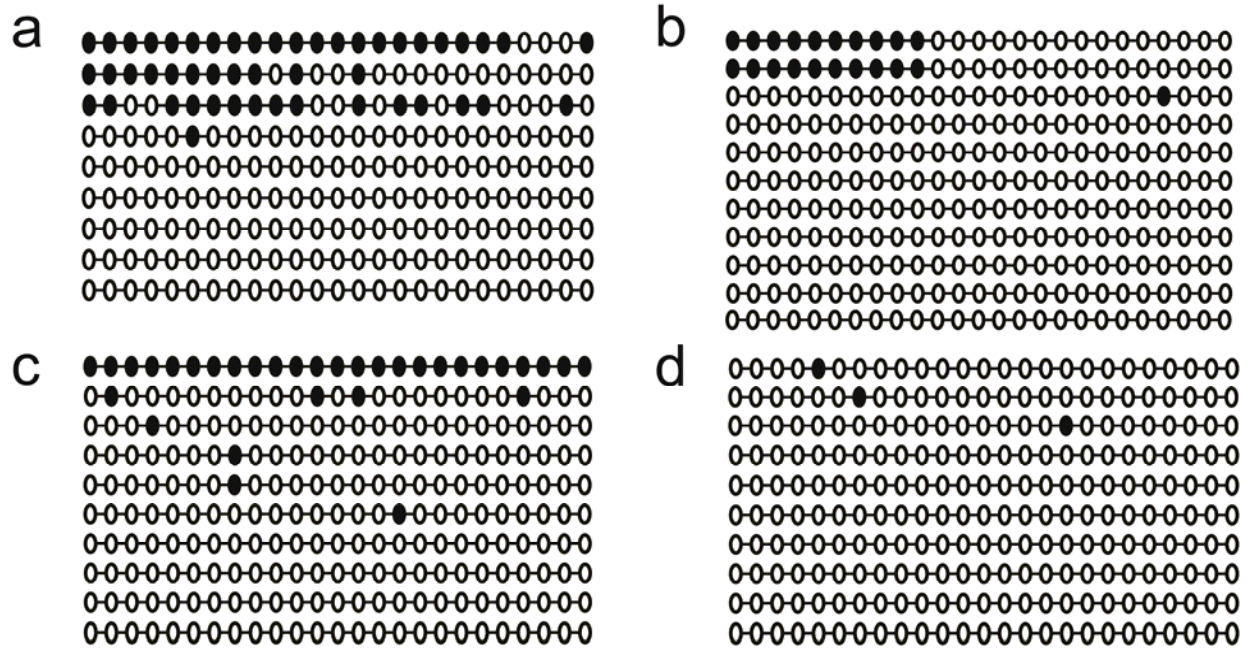

**Figure S2: Bisulfite cloning results of *C9orf72* promoter from four repeat expansion carriers.**

Each oval represents a CpG site, where black ovals are methylated CpG dinucleotides and white ovals are unmethylated CpG dinucleotides. A total of nine to eleven clones were sequenced for each case. Clones with at least 10 methylated CpG sites were counted as hypermethylated. Background conversion rate of non-CpG cytosines for each case was >95%. Methylation levels assessed by *HhaI* resistance were: (a) 29.92%, (b) 10.4%, (c) 6.93%, and (d) 6.26%.

**Table S1: Clinical characteristics of *C9orf72* repeat expansion carriers (four disease subtypes)**

|                            | <b>ALS</b>          | <b>ALS-MCI</b>      | <b>ALS-FTD</b>      | <b>FTD</b>          |
|----------------------------|---------------------|---------------------|---------------------|---------------------|
| <b>Blood, n</b>            | 27                  | 16                  | 13                  | 27                  |
| Deaths                     | 22                  | 10                  | 8                   | 8                   |
| Gender, no. male (%)       | 18 (66.67)          | 9 (56.25)           | 9 (69.23)           | 15 (55.56)          |
| Age at onset, yr (IQR)     | 57.63 (52.03-66.08) | 54.06 (50.81-62.50) | 53.75 (47.51-60.60) | 58.01 (50.51-62.05) |
| Age at death, yr (IQR)     | 62.10 (57.08-70.26) | 57.47 (54.01-63.69) | 59.58 (50.05-68.38) | 63.14 (57.06-67.42) |
| Disease duration, yr (IQR) | 2.56 (1.93-3.57)    | 2.62 (1.88-3.16)    | 2.50 (2.18-2.77)    | 5.45 (4.15-9.35)    |
| Methylation, pct (IQR)     | 5.51 (1.73-9.17)    | 8.60 (2.93-19.68)   | 4.98 (1.58-12.27)   | 8.18 (1.47-30.38)   |

Data are shown as median and interquartile range (IQR) unless otherwise stated.

**Table S2: Peripheral blood *C9orf72* promoter methylation and age at onset, age at death and disease duration (four disease subtypes).**

|                                 | Age at onset<br>(n = 77) |                   |         | Age at death<br>(n = 47) |                  |         | Disease duration<br>(ln transformed, n=47) |                  |         |
|---------------------------------|--------------------------|-------------------|---------|--------------------------|------------------|---------|--------------------------------------------|------------------|---------|
|                                 | $\beta$ (SE)             | 95% CI            | p-value | $\beta$ (SE)             | 95% CI           | p-value | $\beta$ (SE)                               | 95% CI           | p-value |
| Intercept                       | 57.84<br>(2.34)          | 53.16 to<br>62.51 | <0.001  | 3.25<br>(1.98)           | -0.77 to<br>7.26 | 0.110   | 0.97<br>(0.55)                             | 0.03 to<br>2.04  | 0.084   |
| Diagnosis (ALS-MCI)             | -4.01<br>(3.90)          | -11.80 to<br>3.77 | 0.307   | -0.31<br>(1.09)          | -2.52 to<br>1.90 | 0.778   | -0.03<br>(0.30)                            | -5.90 to<br>4.51 | 0.925   |
| Diagnosis (ALS-FTD)             | -5.85<br>(3.67)          | -13.18 to<br>1.47 | 0.115   | -1.30<br>(0.87)          | -3.06 to<br>0.45 | 0.141   | -0.25<br>(0.24)                            | -5.90 to<br>4.51 | 0.299   |
| Diagnosis (FTD)                 | -0.45<br>(3.13)          | -6.70 to<br>5.81  | 0.887   | 1.46<br>(1.09)           | -0.75 to<br>3.67 | 0.190   | 0.45<br>(0.30)                             | -0.32 to<br>0.65 | 0.140   |
| Gender (Male)                   | 2.89<br>(1.95)           | -1.00 to<br>6.78  | 0.143   | 0.01<br>(0.52)           | -1.04 to<br>1.06 | 0.989   | -0.08<br>(0.14)                            | -0.41 to<br>0.15 | 0.585   |
| Age at onset                    | n.a.                     | n.a.              | n.a.    | 0.99<br>(0.03)           | 0.93 to<br>1.06  | <0.001  | 0.00<br>(0.01)                             | -0.02 to<br>0.02 | 0.945   |
| Methylation                     | -0.18<br>(0.13)          | -0.45 to<br>0.09  | 0.179   | -0.01<br>(0.03)          | -0.07 to<br>0.05 | 0.652   | -0.01<br>(0.01)                            | -0.02 to<br>0.01 | 0.433   |
| Methylation*Diagnosis (ALS-MCI) | 0.18<br>(0.27)           | -0.35 to<br>0.72  | 0.496   | -0.00<br>(0.08)          | -0.16 to<br>0.15 | 0.975   | -0.00<br>(0.02)                            | -5.90 to<br>4.51 | 0.995   |
| Methylation*Diagnosis (ALS-FTD) | 0.29<br>(0.27)           | -0.24 to<br>0.82  | 0.284   | 0.22<br>(0.06)           | 0.10 to<br>0.34  | <0.001  | 0.05<br>(0.02)                             | -5.90 to<br>4.51 | 0.006   |
| Methylation*Diagnosis (FTD)     | 0.08<br>(0.17)           | -0.26 to<br>0.42  | 0.628   | 0.11<br>(0.05)           | 0.02 to<br>0.20  | 0.021   | 0.02<br>(0.01)                             | 0.01 to<br>0.05  | 0.084   |
| R <sup>2</sup>                  |                          | 0.088             |         |                          | 0.971            |         |                                            | 0.497            |         |

SE – standard error, CI – confidence interval, ln – natural log
